# Supplementary material for: Vacuolar-type H+-ATPase subunits and the neurogenic protein big brain are required for optimal copper and zinc uptake
Source: Royal Society of Chemistry journal article supplement (doi:10.1039/c4mt00196f), 2014-01-01
Supplement: c4mt00196f1.pdf [file c4mt00196f1.pdf]

## WANG ET AL 2014: SUPPLEMENTARY INFORMATION

**Figure S1. Ectopic expression of *CtrlA* or *CtrlB* fails to rescue the hypo-pigmentation caused by knockdown of *vhaPPA1-2* or *bib*.** All flies have *Pnr-Gal4*. kd = knockdown, oe = over-expression. A) *Pnr-Gal4>UAS-vhaPPA1-2<sup>RNAi</sup>; UAS-CtrlA<sup>flag</sup>* fly with mild hypo-pigmentation still seen in the thorax and abdomen. B) *Pnr-Gal4>UAS-bib<sup>RNAi</sup>; UAS-CtrlA<sup>flag</sup>* fly with moderate hypo-pigmentation still seen in the thorax and abdomen. C) *Pnr-Gal4>UAS-vhaPPA1-2<sup>RNAi</sup>; UAS-CtrlB<sup>flag</sup>* fly with stripes of mild hypo-pigmentation still seen on the shoulders. D) *Pnr-Gal4>UAS-bib<sup>RNAi</sup>; UAS-CtrlB<sup>flag</sup>* fly with moderate hypo-pigmentation still seen in the thorax and abdomen. Scale bar = 200  $\mu\text{m}$
